# Supplementary material
Source: publisher site journal article supplement (https://www.spandidos-publications.com/7569/downloadSupplementary)
Supplement: Supplementary file 1 [file downloadSupplementary]

## Sheet: Table SI
Table SI. The reagents and resources used in this study.
Reagent or resource	Type	Source	cat. no.
ATM	Antibodies	Proteintech Group, Inc.	27156-1-AP
DPP4	Antibodies	Proteintech Group, Inc.	68383-1-Ig
Thioredoxin	Antibodies	Proteintech Group, Inc.	14999-1-AP
ACSL4	Antibodies	Proteintech Group, Inc.	22401-1-AP
SLC7A11	Antibodies	Proteintech Group, Inc.	26864-1-AP
GPX4	Antibodies	Proteintech Group, Inc.	67763-1-Ig
FTH1	Antibodies	Proteintech Group, Inc.	11682-1-AP
Beta Actin	Antibodies	Proteintech Group, Inc.	66009-1-Ig
HRP-conjugated Goat Anti-Rabbit IgG(H+L)	Antibodies	Proteintech Group, Inc.	SA00001-2
HRP-conjugated Goat Anti-Mouse IgG(H+L)	Antibodies	Proteintech Group, Inc.	SA00001-1
Lipopolysaccharides	Chemicals	MedChemExpress	HY-D1056
phorbol myristate acetate	Chemicals	MedChemExpress	HY-18739
RIPA Lysis Buffer	Chemicals	Beyotime Institute of Biotechnology	P0013B
Protease and Phosphatase Inhibitor Cocktail	Chemicals	Beyotime Institute of Biotechnology	P1045
PMSF	Chemicals	Beyotime Institute of Biotechnology	ST505
SDS-PAGE Sample Loading Buffer	Chemicals	Beyotime Institute of Biotechnology	P0015
Immun-Blot PVDF Membrane	Chemicals	Bio-Rad Laboratories, Inc.	1620177
Nonfat Powdered Milk	Chemicals	Beyotime Institute of Biotechnology	P0216
BeyoECL Star	Chemicals	Beyotime Institute of Biotechnology	P0018AM
TBSTw	Chemicals	Beyotime Institute of Biotechnology	ST671
Ethanol Anhydrous	Chemicals	Shanghai Macklin Biochemical Co., Ltd.	E809056
Hoechst 33342	Chemicals	Beyotime Institute of Biotechnology	C1027
SYBR Green qPCR Master Mix	Chemicals	MedChemExpress	HY-K0501
RNAiso Plus	Chemicals	Takara Bio, Inc.	9108
PrimeScript™ RT reagent Kit with gDNA Eraser (Perfect Real Time)	Critical Commercial Assays	Takara Bio, Inc.	RR047A
Advanced DNA RNA transfection reagent	Critical Commercial Assays	ZETA LIFE Inc.	AD600150
Lipid Peroxidation MDA Assay Kit	Critical Commercial Assays	Beyotime Institute of Biotechnology	S0131S
GSH and GSSG Assay Kit	Critical Commercial Assays	Beyotime Institute of Biotechnology	S0053
FerroOrange (Fe2+ indicator)	Critical Commercial Assays	Shanghai Maokang Biotechnology Co., Ltd.	MX4559
Enhanced BCA Protein Assay Kit	Critical Commercial Assays	Beyotime Institute of Biotechnology	P0010S
RPMI-1640	Other	Gibco, Thermo Fisher Scientific, Inc.,	11875093
Fetal Bovine Serum	Other	Gibco, Thermo Fisher Scientific, Inc.,	A5670701
Trypsin 1:250	Other	neoFroxx	1004GR025
β-mercaptoethanolin	Other	MilliporeSigma	M6250
Penicillin-Streptomycin Solution	Other	Beyotime Institute of Biotechnology	C0222
